# Supplementary material for: Concordance of Clinician-Documented and Imaging Response in Patients With Stage IV Non–Small Cell Lung Cancer Treated With First-Line Therapy
Source: PubMed Central journal article supplement — JAMA Netw Open. 2022 May 12;5(5):e229655. doi: 10.1001/jamanetworkopen.2022.9655 (PMC9099424; doi:10.1001/jamanetworkopen.2022.9655), 2022-05-12
Supplement: jamanetwopen-e229655-s001.pdf [file jamanetwopen-e229655-s001.pdf]

## Supplemental Online Content

Ma X, Bellomo L, Hooley I, et al. Concordance of clinician-documented and imaging response in patients with stage IV non–small cell lung cancer treated with first-line therapy. *JAMA Network Open*. 2022;5(5):e229655. doi:10.1001/jamanetworkopen.2022.9655

**eFigure.** Scan timepoint bundling guide

**eTable 1.** Cohort characteristics for the feasibility evaluation and the concordance analysis. Comparison with the parent database where the cohorts were sourced

**eTable 2.** Detailed concordance results according to scan availability and modality of available scans

**eTable 3.** Reasons for discordant cases between CAR and Imaging Response Based on RECIST in binary confirmed response

This supplemental material has been provided by the authors to give readers additional information about their work.

# Supplemental Figure 1. Scan Timepoint Bundling Guide

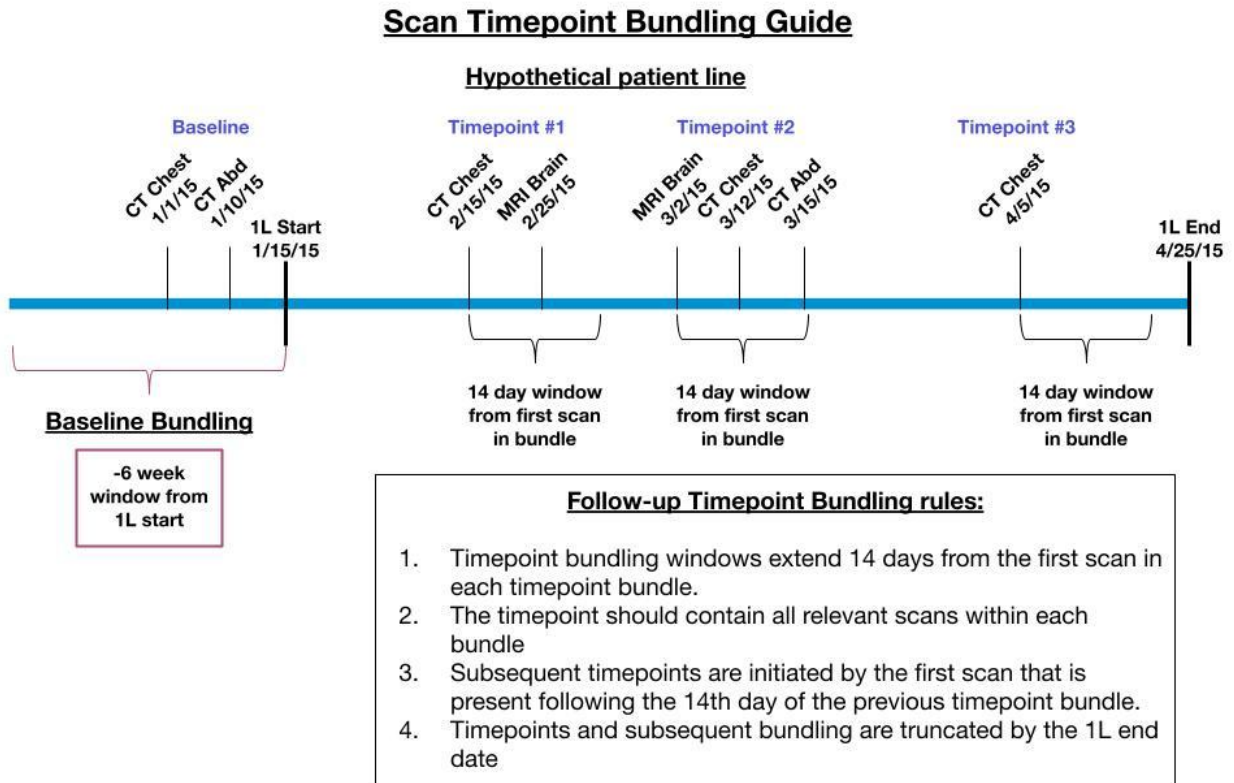

**Supplemental Table 1. Cohort characteristics for the feasibility evaluation and the concordance analysis. Comparison with the parent database where the cohorts were sourced**

|                                             |                   | Feasibility Cohort (N=1210) | Concordance Cohort (N=100) | In feasibility cohort, not in concordance cohort (N=1110) | Stage IV, with 1L for aNSCLC in parent database (N=23,821) |
|---------------------------------------------|-------------------|-----------------------------|----------------------------|-----------------------------------------------------------|------------------------------------------------------------|
| Median age at metastatic diagnosis, y [IQR] |                   | 69.0 [62.0;76.0]            | 67.5 [60.8;76.0]           | 70.0 [62.0;76.0]                                          | 68.0 [61.0;75.0]                                           |
| Sex, n (%)                                  | Female            | 591 (48.8)                  | 51 (51.0)                  | 540 (48.6)                                                | 11055 (46.4)                                               |
|                                             | Male              | 619 (51.2)                  | 49 (49.0)                  | 570 (51.4)                                                | 12766 (53.6)                                               |
| Race, n (%)                                 | Asian             | 31 (2.6)                    | 3 (3.0)                    | 28 (2.5)                                                  | 676 (2.8)                                                  |
|                                             | Black/Afr.Am      | 42 (3.5)                    | 1 (1.0)                    | 41 (3.7)                                                  | 2012 (8.4)                                                 |
|                                             | Other             | 96 (7.9)                    | 6 (6.0)                    | 90 (8.1)                                                  | 2213 (9.3)                                                 |
|                                             | Unknown           | 155 (12.8)                  | 6 (6.0)                    | 149 (13.4)                                                | 2528 (10.6)                                                |
|                                             | White             | 886 (73.2)                  | 84 (84.0)                  | 802 (72.3)                                                | 16392 (68.8)                                               |
| Histology, n (%)                            | Non-squamous cell | 919 (76.0)                  | 83 (83.0)                  | 836 (75.3)                                                | 17891 (75.1)                                               |
|                                             | NOS               | 49 (4.0)                    | 0 (0.0)                    | 49 (4.4)                                                  | 1250 (5.2)                                                 |
|                                             | Squamous cell     | 242 (20.0)                  | 17 (17.0)                  | 225 (20.3)                                                | 4680 (19.6)                                                |
| Smoking history, n (%)                      | Yes               | 992 (82.0)                  | 82 (82.0)                  | 910 (82.0)                                                | 20083 (84.3)                                               |
|                                             | No                | 215 (17.8)                  | 18 (18.0)                  | 197 (17.7)                                                | 3512 (14.7)                                                |
|                                             | Unknown           | 3 (0.2)                     | 0 (0.0)                    | 3 (0.3)                                                   | 226 (0.9)                                                  |
| Metastatic                                  | 2011-14           | 497 (41.1)                  | 36 (36.0)                  | 461 (41.5)                                                | 9384 (39.4)                                                |

|                              |                           | Feasibility Cohort (N=1210) | Concordance Cohort (N=100) | In feasibility cohort, not in concordance cohort (N=1110) | Stage IV, with 1L for aNSCLC in parent database (N=23,821) |
|------------------------------|---------------------------|-----------------------------|----------------------------|-----------------------------------------------------------|------------------------------------------------------------|
| diagnosis year, n (%)        | 2015-17                   | 501 (41.4)                  | 49 (49.0)                  | 452 (40.7)                                                | 10115 (42.5)                                               |
|                              | ≥2018                     | 212 (17.5)                  | 15 (15.0)                  | 197 (17.7)                                                | 4322 (18.1)                                                |
| <i>EGFR</i> mut, n (%)       | Tested                    | 585 (48.3)                  | 54 (54.0)                  | 531 (47.8)                                                | 12647 (53.1)                                               |
|                              | Mutation negative         | 433 (74.0)                  | 37 (68.5)                  | 396 (74.6)                                                | 9684 (76.6)                                                |
|                              | Mutation positive         | 114 (19.5)                  | 13 (24.1)                  | 101 (19.0)                                                | 2181 (17.2)                                                |
|                              | Other                     | 38 (6.5)                    | 4 (7.4)                    | 34 (6.4)                                                  | 782 (6.2)                                                  |
| <i>ALK</i> alteration, n (%) | Tested                    | 580 (47.9)                  | 52 (52.0)                  | 528 (47.6)                                                | 11692 (49.1)                                               |
|                              | Rearrangement not present | 496 (85.5)                  | 48 (92.3)                  | 448 (84.8)                                                | 10174 (87.0)                                               |
|                              | Rearrangement present     | 25 (4.3)                    | 3 (5.8)                    | 22 (4.2)                                                  | 385 (3.3)                                                  |
|                              | Other                     | 59 (10.2)                   | 1 (1.9)                    | 58 (11.0)                                                 | 1133 (9.7)                                                 |
| <i>KRAS</i> mut, n (%)       | Tested                    | 195 (16.1)                  | 17 (17.0)                  | 178 (16.0)                                                | 4833 (20.3)                                                |
|                              | Mutation negative         | 121 (62.1)                  | 7 (41.2)                   | 114 (64.0)                                                | 3252 (67.3)                                                |
|                              | Mutation positive         | 62 (31.8)                   | 9 (52.9)                   | 53 (29.8)                                                 | 1363 (28.2)                                                |
|                              | Other                     | 12 (6.2)                    | 1 (5.9)                    | 11 (6.2)                                                  | 218 (4.5)                                                  |
| 1L therapy, n (%)            | ALK inhibitor             | 22 (1.8)                    | 3 (3.0)                    | 19 (1.7)                                                  | 487 (2.0)                                                  |
|                              | Anti-VEGF-based           | 192 (15.9)                  | 27 (27.0)                  | 165 (14.9)                                                | 4129 (17.3)                                                |
|                              | Clinical study            | 6 (0.5)                     | 0 (0.0)                    | 6 (0.5)                                                   | 707 (3.0)                                                  |

|                                 | Feasibility Cohort (N=1210) | Concordance Cohort (N=100) | In feasibility cohort, not in concordance cohort (N=1110) | Stage IV, with 1L for aNSCLC in parent database (N=23,821) |
|---------------------------------|-----------------------------|----------------------------|-----------------------------------------------------------|------------------------------------------------------------|
| EGFR TKI                        | 128 (10.6)                  | 19 (19.0)                  | 109 (9.9)                                                 | 2530 (10.6)                                                |
| Anti-EGFR antibody -based       | 3 (0.2)                     | 1 (1.0)                    | 2 (0.2)                                                   | 82 (0.3)                                                   |
| Non-platinum-based chemo. comb. | 3 (0.2)                     | 0 (0.0)                    | 3 (0.3)                                                   | 44 (0.2)                                                   |
| Other                           | 1 (0.1)                     | 0 (0.0)                    | 1 (0.1)                                                   | 46 (0.2)                                                   |
| PD-(L)1-based                   | 182 (15.1)                  | 15 (15.0)                  | 167 (15.1)                                                | 4206 (17.7)                                                |
| Platinum-based chemo. comb.     | 631 (52.4)                  | 35 (35.0)                  | 596 (53.9)                                                | 10701 (44.9)                                               |
| Single-agent chemotherapy       | 37 (3.1)                    | 0 (0.0)                    | 37 (3.3)                                                  | 889 (3.7)                                                  |

ALK=anaplastic lymphoma kinase; EGFR=epidermal growth factor receptor; IQR=interquartile range; NOS=not otherwise specified; PD-(L)1=programmed cell death-(ligand) 1; TKI=tyrosine kinase inhibitor; VEGF=vascular endothelial growth factor

**Supplemental Table 2. Detailed concordance results according to scan availability and modality of available scans**

| Description                                                                                                               | N  | Best unconfirmed response | Best confirmed response | Dichotomized unconfirmed response | Dichotomized confirmed response |
|---------------------------------------------------------------------------------------------------------------------------|----|---------------------------|-------------------------|-----------------------------------|---------------------------------|
| <b>Baseline scan modality and coverage, agreement % (95% CI)</b>                                                          |    |                           |                         |                                   |                                 |
| Had CT C/A/P and CT/MRI brain                                                                                             | 36 | 63.9<br>(46.2, 79.2)      | 58.3<br>(40.8, 74.5)    | 72.2 (54.8, 85.8)                 | 69.4 (51.9, 83.7)               |
| Had CT C/A/P                                                                                                              | 36 | 63.9<br>(46.2, 79.2)      | 47.2<br>(30.4, 64.5)    | 88.9 (73.9, 96.9)                 | 75.0 (57.8, 87.9)               |
| Had CT with partial C/A/P coverage (with or without PET CT or MRI)                                                        | 28 | 42.9<br>(24.5, 62.8)      | 50 (30.6, 69.4)         | 57.1 (37.2, 75.5)                 | 67.9 (47.6, 84.1)               |
| <b>Consistent anatomic coverage from baseline to end of follow-up, agreement % (95% CI)</b>                               |    |                           |                         |                                   |                                 |
| No                                                                                                                        | 84 | 59.5<br>(48.3, 70.1)      | 52.4<br>(41.2, 63.4)    | 73.8 (63.1, 82.8)                 | 69 (58.0, 78.7)                 |
| Yes                                                                                                                       | 16 | 50 (24.7, 75.3)           | 50 (24.7, 75.3)         | 75 (47.6, 92.7)                   | 81.2 (54.4, 96)                 |
| CT=computed tomography; C/A/P=chest, abdomen, or pelvis; MRI=magnetic resonance imaging; PET=positron emission tomography |    |                           |                         |                                   |                                 |

**Supplemental Table 3. Reasons for discordant cases between CAR and IRb-RECIST in binary confirmed response**

| <b>Reason</b>                                                                                                                                | <b>Example</b>                                                                                                      | <b>Number of Cases</b> | <b>% of total discordant cases</b> |
|----------------------------------------------------------------------------------------------------------------------------------------------|---------------------------------------------------------------------------------------------------------------------|------------------------|------------------------------------|
| Threshold for response                                                                                                                       | rwPR not meeting the 30% threshold for IRb-RECIST PR                                                                | 9                      | 31%                                |
| Availability of scans                                                                                                                        | Digital images unavailable in a given follow-up timepoint                                                           | 6                      | 21%                                |
|                                                                                                                                              | Baseline digital images of a certain anatomic region were unavailable, which resulted in false new lesion RECIST PD | 4                      | 13%                                |
| Other                                                                                                                                        | Abstractor error                                                                                                    | 3                      | 10%                                |
|                                                                                                                                              | Lack of documentation in EHR                                                                                        | 3                      | 10%                                |
|                                                                                                                                              | Clinician documentation (CAR) and IRb-RECIST output misalign                                                        | 3                      | 10%                                |
|                                                                                                                                              | Unknown                                                                                                             | 1                      | 3%                                 |
| CAR=clinician-assessed response; PD=progressive disease; NE=non-evaluable; PR=partial response; IRb-RECIST=imaging response based on RECIST. |                                                                                                                     |                        |                                    |
